# Supplementary material for: The Spiral Spectrum of a Laguerre–Gaussian Beam Carrying the Cross-Phase Propagating in Weak-to-Strong Atmospheric Turbulence
Source: MDPI journal article supplement (doi:10.3390/photonics11020148), 2024-02-04
Supplement: s1 [file s1]

# Supplementary Materials for

## The Spiral Spectrum of a Laguerre–Gaussian Beam Carrying the Cross-Phase Propagating in Weak-to-Strong Atmospheric Turbulence

Yunxiao Li <sup>1,2</sup>, Zhao Zhang <sup>1,2</sup>, Ruyi Li <sup>1,2</sup>, Dong Xu <sup>1,2</sup>, Hao Zhang <sup>3</sup>, Yangjian Cai <sup>1,2,4,\*</sup> and Jun Zeng <sup>1,2,4,\*</sup>

<sup>1</sup> Shandong Provincial Engineering and Technical Center of Light Manipulations & Shandong Provincial Key Laboratory of Optics and Photonic Device, School of Physics and Electronics, Shandong Normal University, Jinan 250358, China

<sup>2</sup> Collaborative Innovation Center of Light Manipulation and Applications, Shandong Normal University, Jinan 250358, China

<sup>3</sup> School of Physics and Engineering, Henan University of Science and Technology, Luoyang 471023, China

<sup>4</sup> Joint Research Center of Light Manipulation Science and Photonic Integrated Chip of East China Normal University and Shandong Normal University, East China Normal University, Shanghai 200241, China

\* Correspondence: yangjiancai@sdsu.edu.cn (Y.C.); zengjun@sdsu.edu.cn (J.Z.)

## Theoretical derivation of the propagation formula for a Laguerre–Gaussian beam carrying the cross-phase in atmospheric turbulence

We consider the example of a Laguerre-Gaussian (LG) beam carrying the cross-phase with a radial mode index  $p=0$  and an azimuthal mode index  $l$ , whose electric field in the source plane has the following form:

$$E_0(\mathbf{r}) = Cr^{|l|} \exp\left(-\frac{r^2}{\omega_0^2}\right) \exp(il\varphi) \exp(iuxy), \quad (S1)$$

where  $C = \sqrt{\frac{2}{\pi\omega_0^2 |l|!}} \left(\frac{\sqrt{2}}{\omega_0}\right)^{|l|}$  denotes the constant coefficient,  $\mathbf{r} = (x, y)$  and  $\varphi = \arctan(y/x)$  are the radial coordinate and azimuthal angle coordinate, respectively.  $\omega_0$  is the initial beam width. The last term  $\exp(iuxy)$  is CP structure, where the quantity  $u$  stands for the CP strength factor.

Based on the extended Huygens–Fresnel integral, the mutual coherent function of an LG beam carrying the cross-phase in the receiving plane after propagating in atmospheric turbulence can be written as follows [1]:

$$\begin{aligned} \Gamma(\mathbf{p}_1, \mathbf{p}_2, z) = & \frac{1}{\lambda^2 z^2} \int_{-\infty}^{\infty} \int_{-\infty}^{\infty} E_0(\mathbf{r}_1) E_0^*(\mathbf{r}_2) \exp\left[\frac{ik}{2z}(\mathbf{p}_1 - \mathbf{r}_1)^2 - \frac{ik}{2z}(\mathbf{p}_2 - \mathbf{r}_2)^2\right] \\ & \times \left\langle \exp\left[\psi(r_1, \rho_1, z) + \psi^*(r_2, \rho_2, z)\right] \right\rangle d^2\mathbf{r}_1 d^2\mathbf{r}_2 \end{aligned} \quad (S2)$$

where  $\mathbf{p}_i = (\rho_{ix}, \rho_{iy})$  ( $i=1, 2$ ) denotes the transverse position vectors in the receiving plane ( $z>0$ ).  $\lambda$  and the asterisk stand for the wavelength of the light beam and the complex conjugate, respectively. The angle brackets represent the ensemble averaging over the turbulence fluctuations, where the term  $\psi(\mathbf{r}, \mathbf{p}, z)$  is turbulence-induced complex perturbations of a spherical wave propagating from  $(\mathbf{r}, 0)$  to  $(\mathbf{p}, z)$ .

To generalize our calculation results, we assume that the turbulence is anisotropic and obeys the Kolmogorov spectrum when calculating Eq. (S2). According to the turbulence spectrum model with the power law index  $\alpha=11/3$  proposed in reference, the second-order statistics of the complex phase perturbation may be represented as follows:

$$\left\langle \exp\left[\psi(r_1, \rho_1, z) + \psi^*(r_2, \rho_2, z)\right] \right\rangle = \exp\left[-T\mu_z \left(\frac{\rho_{xd}^2}{\mu_x^2} + \frac{\rho_{yd}^2}{\mu_y^2} + \frac{x_d^2}{\mu_x^2} + \frac{y_d^2}{\mu_y^2} + \frac{\rho_{xd}x_d}{\mu_x^2} + \frac{\rho_{yd}y_d}{\mu_y^2}\right)\right], \quad (S3)$$

with

$$\begin{aligned} \rho_d &= \mathbf{p}_1 - \mathbf{p}_2 = (\rho_{xd}, \rho_{yd}) = (\rho_{1x} - \rho_{2x}, \rho_{1y} - \rho_{2y}) \\ \mathbf{r}_d &= \mathbf{r}_1 - \mathbf{r}_2 = (x_d, y_d) = (x_1 - x_2, y_1 - y_2) \\ T &= 0.0033\pi^2 k^2 z C_n^2 \left[ \eta \kappa_m^{-5/3} \exp(\kappa_0^2 / \kappa_m^2) \Gamma_1(1/6, \kappa_0^2 / \kappa_m^2) - 2\kappa_0^{1/3} \right], \\ \eta &= 2\kappa_0^2 + 5/3\kappa_m^2, \kappa_0 = 2\pi / L_0, \kappa_m = 5.92 / l_0 \end{aligned} \quad (S4)$$

where  $k$  is the wave number and  $C_n^2$  denotes the structure constant of turbulence with unit  $\text{m}^{-2/3}$ .  $L_0$  and  $l_0$  stand for the outer and inner scale of the turbulence, respectively. The symbol  $\Gamma_1$  is the incomplete Gamma function. Three anisotropic factors  $\mu_x$ ,  $\mu_y$  and  $\mu_z$  were introduced in anisotropic turbulence that was pertinent to the size of eddies along the  $x$ ,  $y$  and  $z$  directions [2].

By substituting Eq. (S1) and Eq. (S3) into Eq. (S2), we can rewrite Eq. (S2) as follows:

$$\begin{aligned} \Gamma(\mathbf{p}_1, \mathbf{p}_2, z) = & \frac{1}{\lambda^2 z^2} \int_{-\infty}^{\infty} \int_{-\infty}^{\infty} |C|^2 r_1^{|l|} r_2^{|l|} \exp[il(\varphi_1 - \varphi_2)] \exp\left[-\frac{\mathbf{r}_1^2 + \mathbf{r}_2^2}{\omega_0^2}\right] \exp(iux_1 y_1 - iux_2 y_2) \\ & \times \exp\left[\frac{ik}{2z}(\mathbf{p}_1 - \mathbf{r}_1)^2 - \frac{ik}{2z}(\mathbf{p}_2 - \mathbf{r}_2)^2\right] \exp\left[-T\mu_z \left(\frac{\rho_{xd}^2}{\mu_x^2} + \frac{\rho_{yd}^2}{\mu_y^2} + \frac{x_d^2}{\mu_x^2} + \frac{y_d^2}{\mu_y^2} + \frac{\rho_{xd}x_d}{\mu_x^2} + \frac{\rho_{yd}y_d}{\mu_y^2}\right)\right] d^2\mathbf{r}_1 d^2\mathbf{r}_2 \end{aligned} \quad (S5)$$

To evaluate Eq. (S5), we use the binomial expansion theorem as follows:

$$(x_1 + iy_1)^l = \sum_{c_1=0}^l \frac{l! i^{c_1}}{c_1! (l-c_1)!} x_1^{l-c_1} y_1^{c_1}, \quad (x_2 - iy_2)^l = \sum_{c_2=0}^l \frac{l! (-i)^{c_2}}{c_2! (l-c_2)!} x_2^{l-c_2} y_2^{c_2}, \quad l > 0. \quad (S6)$$

By substituting Eq. (S6) into Eq. (S5), we obtain the formula:

$$\begin{aligned} \Gamma(\mathbf{p}_1, \mathbf{p}_2, z) = & \frac{|C|^2}{\lambda^2 z^2} \sum_{c_1=0}^l \sum_{c_2=0}^l \frac{l! i^{c_1}}{c_1! (l-c_1)!} \frac{l! (-i)^{c_2}}{c_2! (l-c_2)!} \exp\left[\frac{ik}{2z}(\mathbf{p}_1^2 - \mathbf{p}_2^2)\right] \exp[-a\mathbf{p}_{xd}^2 - b\mathbf{p}_{yd}^2] \\ & \times \int_{-\infty}^{\infty} x_2^{l-c_2} \exp[-N_1^* x_2^2] \exp\left[\frac{ik}{z}\rho_{x2}x_2 + a\mathbf{p}_{xd}x_2 - iuy_2x_2\right] dx_2 \\ & \times \int_{-\infty}^{\infty} y_2^{c_2} \exp[-N_2^* y_2^2] \exp\left[\frac{ik}{z}\rho_{y2}y_2 + b\mathbf{p}_{yd}y_2\right] dy_2, \quad (S7) \\ & \times \int_{-\infty}^{\infty} y_1^{c_1} \exp[-N_2 y_1^2] \exp\left[\left(-\frac{ik}{z}\rho_{y1} + 2by_2 - b\mathbf{p}_{yd}\right)y_1\right] dy_1 \\ & \times \int_{-\infty}^{\infty} x_1^{l-c_1} \exp[-N_1 x_1^2] \exp\left[\left(-\frac{ik}{z}\rho_{x1} + 2ax_2 - a\mathbf{p}_{xd} + iuy_1\right)x_1\right] dx_1 \end{aligned}$$

with

$$a = \frac{T\mu_z}{\mu_x^2}, b = \frac{T\mu_z}{\mu_y^2}, N_1 = \left(\frac{1}{\omega_0^2} - \frac{ik}{2z} + a\right), N_2 = \left(\frac{1}{\omega_0^2} - \frac{ik}{2z} + b\right), \quad (S8)$$

To evaluate Eq. (S7), we complete the operation with the help of the following equations:

$$\begin{aligned} \int_{-\infty}^{\infty} x^\alpha \exp[-(x-\beta)^2] dx &= (2i)^{-\alpha} \sqrt{\pi} H_\alpha(i\beta) \\ H_\alpha(x+\beta) &= \frac{1}{2^{\alpha/2}} \sum_{p=0}^{\alpha} \binom{\alpha}{p} H_p(\sqrt{2}x) H_{\alpha-p}(\sqrt{2}\beta), \quad (S9) \\ H_n(x_1) &= \sum_{m=0}^{[n/2]} (-1)^m \frac{n!}{m!(n-2m)!} (2x_1)^{n-2m} \end{aligned}$$

After integration over variables  $x_1, x_2, y_1, y_2$ , we can obtain the final analytical expression for mutual coherent function of a LG beam carrying the cross-phase in the receiving plane as follows:

$$\begin{aligned} \Gamma(\mathbf{p}_1, \mathbf{p}_2, z) = & \frac{|C|^2}{\lambda^2 z^2} \sum_{c_1=0}^l \sum_{c_2=0}^l \frac{l! i^{c_1}}{c_1! (l-c_1)!} \frac{l! (-i)^{c_2}}{c_2! (l-c_2)!} \exp\left[\frac{ik}{2z}(\mathbf{p}_1^2 - \mathbf{p}_2^2)\right] \exp[-a\mathbf{p}_{xd}^2 - b\mathbf{p}_{yd}^2] \\ & \times \frac{\pi^2 (2i)^{2m_1-l-q_1-n_1-n_2}}{2^{(l+p_1+q_1-2m_1+p_2+n_1)/2}} N_1^{(c_1-l-1)/2} N_3^{-(c_1+q_1-2m_1+1)/2} N_4^{-(n_1+1)/2} N_6^{-(n_2+1)/2} \exp\left[\frac{\Delta_{x1}^2}{4N_1} + \frac{\Delta_{y1}^2}{4N_3} + \frac{\Delta_{x2}^2}{4N_4} + \frac{\Delta_{y2}^2}{4N_6}\right] \\ & \times \sum_{p_1=0}^{l-c_1} \sum_{q_1=0}^{p_1} \sum_{m_1=0}^{[q_1/2]} \sum_{m_2=0}^{[(p_1-q_1)/2]} \sum_{p_2=0}^{c_1+q_1-2m_1} \sum_{q_2=0}^{p_2} \sum_{m_3=0}^{[q_2/2]} \sum_{m_4=0}^{[(p_2-q_2)/2]} \sum_{p_3=0}^{n_1} \sum_{m_5=0}^{[p_3/2]} \binom{l-c_1}{p_1} \binom{p_1}{q_1} \binom{c_1+q_1-2m_1}{p_2} \binom{p_2}{q_2} \binom{n_1}{p_3} \\ & \times \frac{(q_1)!}{m_1!(q_1-2m_1)!} \frac{(p_1-q_1)!}{m_2!(p_1-q_1-2m_2)!} \frac{q_2!}{m_3!(q_2-2m_3)!} \frac{(p_2-q_2)!}{m_4!(p_2-q_2-2m_4)!} \frac{p_3!}{m_5!(p_3-2m_5)!} \quad (S10) \\ & \times \left(-\frac{2u}{\sqrt{N_1}}\right)^{q_1-2m_1} \left(\frac{4ia}{\sqrt{N_1}}\right)^{p_1-q_1-2m_2} \left(\frac{4ib}{\sqrt{N_3}}\right)^{q_2-2m_3} \left(-\frac{2ua}{N_1\sqrt{N_3}}\right)^{p_2-q_2-2m_4} \left(\frac{\sqrt{2}iN_5}{\sqrt{N_4}}\right)^{p_3-2m_5} \\ & \times (-1)^{m_1+m_2+m_3+m_4+m_5} H_{l-c_1-p_1}\left(\frac{i\Delta_{x1}}{\sqrt{2}N_1}\right) H_{c_1+q_1-2m_1-p_2}\left(\frac{i\Delta_{y1}}{2\sqrt{N_3}}\right) H_{n_1-p_3}\left(\frac{i\Delta_{x2}}{\sqrt{2}N_4}\right) H_{n_2}\left(\frac{i\Delta_{y2}}{2\sqrt{N_6}}\right) \end{aligned}$$

with

$$\begin{aligned}
N_3 &= N_2 + \frac{u^2}{4N_1}, N_4 = N_1^* - \frac{a^2}{N_1} + \frac{u^2 a^2}{4N_1^2 N_3}, N_5 = \frac{i u a b}{N_1 N_3} - i u, N_6 = N_2^* - \frac{b^2}{N_3} - \frac{N_5^2}{4N_4} \\
\Delta_{x1} &= -\frac{ik}{z} \rho_{x1} - a \rho_{xd}, \Delta_{y1} = -\frac{ik}{z} \rho_{y1} - b \rho_{yd} + \frac{i u \Delta_{x1}}{2N_1} \\
\Delta_{x2} &= \frac{ik}{z} \rho_{x2} + a \rho_{xd} + \frac{\Delta_{x1} a}{N_1} + \frac{\Delta_{y1} i u a}{2N_1 N_3}, \Delta_{y2} = \frac{ik}{z} \rho_{y2} + b \rho_{yd} + \frac{b \Delta_{y1}}{N_3} + \frac{N_5 \Delta_{x2}}{2N_4} \\
n_1 &= l - c_2 + p_1 - q_1 - 2m_2 + p_2 - q_2 - 2m_4, n_2 = c_2 + q_2 - 2m_3 + p_3 - 2m_5
\end{aligned} \tag{S11}$$

## References

1. Andrews, L.C. and Phillips, R.L. *Laser Beam Propagation through Random Media*; SPIE Press: Bellingham, USA, 2005.
2. Zeng, J.; Liu, X.; Zhao, C.; Wang, F.; Gbur, G. and Cai, Y. Spiral spectrum of a Laguerre-Gaussian beam propagating in anisotropic non-Kolmogorov turbulent atmosphere along horizontal path. *Opt. Express* **2019**, 27, 25342-25356.
